# Supplementary material for: Nuclease deficiencies alter plasma cell-free DNA methylation profiles
Source: HighWire-hosted journal article supplement (doi:10.1101/gr.275426.121), 2021-09-01
Supplement: Supplemental_Table_S1.xlsx [file Supplemental_Table_S1.xlsx]

## Sheet: Mouse
Supplementary Table 1. Fragment counts obtained from sequencing after bisulfite conversion of mouse samples
Mouse genotype	Sample type	Sample ID	Raw fragment count	Fragment count after preprocessing	Mappable fragments	Mapping rate (%)	Duplicated fragments	Duplication rate	Nonduplicated fragments	Depth (X)	Bisulfite conversion efficiency (%)
Wildtype	Plasma	MuBS_WT_1	415048571	414611472	184739486	44.5573	24058666	13.023	160680820	10.4374	99.8632
Wildtype	Plasma	MuBS_WT_2	414107847	413573579	163886101	39.6268	29937095	18.267	133949006	9.2593	99.8701
Wildtype	Plasma	MuBS_WT_3	410510525	409976285	166283425	40.5593	23156480	13.9259	143126945	9.3947	99.9214
Wildtype	Plasma	MuBS_WT_4	409912664	408332416	128630107	31.5013	25893684	20.1303	102736423	7.2673	99.9215
Wildtype	Plasma	MuBS09	276963588	276737312	136777032	49.4249	34669564	25.3475	102107468	7.7276	99.8747
Wildtype	Plasma	MuBS13	295350399	295138838	157829694	53.4764	39385161	24.9542	118444533	8.917	99.6738
Dnase1l3−/−	Plasma	MuBS_1L3_1	382659263	378467210	100513800	26.5581	19501689	19.402	81012111	5.6788	99.8681
Dnase1l3−/−	Plasma	MuBS_1L3_2	400627667	399803347	70636826	17.6679	19370454	27.4226	51266372	3.9908	99.8573
Dnase1l3−/−	Plasma	MuBS_1L3_3	397758849	396131536	73150134	18.4661	13507455	18.4654	59642679	4.1329	99.9242
Dnase1l3−/−	Plasma	MuBS_1L3_4	382900670	381439100	100354704	26.3095	44248343	44.0919	56106361	5.6699	99.9201
Dnase1l3−/−	Plasma	MuBS03	211340770	210963897	80302000	38.0643	13883346	17.2889	66418654	4.537	99.4877
Dnase1l3−/−	Plasma	MuBS14	218868263	218643643	108832758	49.7763	31504844	28.9479	77327914	6.1488	99.4193
Dnase1−/−	Plasma	MuBS_D1_1	414610933	413861870	157404836	38.03	18827336	11.9611	138577500	8.89	99.8917
Dnase1−/−	Plasma	MuBS_D1_2	400410985	399815539	161540333	40.4037	20154534	12.4765	141385799	9.13	99.8969
Dnase1−/−	Plasma	MuBS_D1_3	389542124	388956140	193350846	49.7102	22556870	11.6663	170793976	10.92	99.8991
Dnase1−/−	Plasma	MuBS_D1_4	387080544	386641568	171211594	44.2817	15840557	9.25204	155371037	9.67	99.8959
Dnase1−/−	Plasma	MuBS05	296582318	296331967	161416046	54.4714	22137616	13.7146	139278430	9.1196	99.7537
Dnase1−/−	Plasma	MuBS06	269924659	269721570	113522970	42.0889	15470783	13.6279	98052187	6.4138	99.73
Wildtype	Buffy coat	MuBS_WT_1	41384092	40782316	19831368	48.6274	685331	3.45579	19146037	1.1204	99.9353
Wildtype	Buffy coat	MuBS_WT_2	42345790	41739121	22367857	53.5897	765020	3.42018	21602837	1.2637	99.9327
Wildtype	Buffy coat	MuBS_WT_3	42689608	42084321	20528844	48.7803	675506	3.29052	19853338	1.1598	99.934
Wildtype	Buffy coat	MuBS_WT_4	35147388	34669541	18601835	53.6547	587622	3.15895	18014213	1.051	99.9351
Wildtype	Buffy coat	MuBS09	393166530	392541310	232476165	59.2234	36497005	15.6992	195979160	13.1344	99.9183
Wildtype	Buffy coat	MuBS13	396970562	396479230	233196137	58.8167	43410987	18.6157	189785150	13.1751	99.9186
Dnase1l3−/−	Buffy coat	MuBS_1L3_1	39282483	38710709	20966214	54.1613	692196	3.30148	20274018	1.1845	99.9296
Dnase1l3−/−	Buffy coat	MuBS_1L3_2	35641458	35169256	19102363	54.3155	655410	3.43104	18446953	1.0793	99.9373
Dnase1l3−/−	Buffy coat	MuBS_1L3_3	31091451	30717426	14527872	47.2952	451169	3.10554	14076703	0.8208	99.9323
Dnase1l3−/−	Buffy coat	MuBS_1L3_4	34515031	33995713	18956773	55.7622	587129	3.0972	18369644	1.071	99.9365
Dnase1l3−/−	Buffy coat	MuBS03	385045700	384525494	223329577	58.0793	32961212	14.759	190368365	12.6177	99.9081
Dnase1l3−/−	Buffy coat	MuBS14	394269449	393802632	244849070	62.1756	38153500	15.5825	206695570	13.8335	99.916
Dnase1−/−	Buffy coat	MuBS_D1_1	407986896	407042415	191024202	46.9298	19699769	10.3127	171324433	10.79	99.9027
Dnase1−/−	Buffy coat	MuBS_D1_2	402212063	401677891	227423869	56.6185	18447339	8.11143	208976530	12.85	99.9041
Dnase1−/−	Buffy coat	MuBS_D1_3	403665586	403080079	198296289	49.1953	16798432	8.47138	181497857	11.2	99.9065
Dnase1−/−	Buffy coat	MuBS_D1_4	412646480	411859781	224769838	54.5744	18112334	8.05817	206657504	12.7	99.8972
Dnase1−/−	Buffy coat	MuBS05	394204499	393643762	230975450	58.6763	43634080	18.8912	187341370	13.0497	99.9205
Dnase1−/−	Buffy coat	MuBS06	390055286	389429211	227256926	58.3564	36685900	16.1429	190571026	12.8396	99.9099
