# Supplementary material for: Nuclease deficiencies alter plasma cell-free DNA methylation profiles
Source: HighWire-hosted journal article supplement (doi:10.1101/gr.275426.121), 2021-09-01
Supplement: Supplemental_Table_S2.xlsx [file Supplemental_Table_S2.xlsx]

## Sheet: Human
Supplementary Table 2. Fragment counts obtained from sequencing after bisulfite conversion of human samples
Human genotype	Sample type	Sample ID	Raw fragment count	Fragment count after preprocessing	Mappable fragments	Mapping rate (%)	Duplicated fragments	Duplication rate	Nonduplicated fragments	Depth (X)	CHH conversion rate (%)
Heterozygous DNASE1L3 mutation	Buffy coat	H1_BC	184255424	183311875	72058248	39.3091	317628	0.44	71740620	3.49	99.8762
Homozygous DNASE1L3 mutation	Buffy coat	H2_BC	185431765	184598424	135313221	73.3014	622748	0.46	134690473	6.56	99.8711
Homozygous DNASE1L3 mutation	Buffy coat	H4_BC	181764563	180661244	136278592	75.4332	693921	0.51	135584671	6.6	99.8902
Heterozygous DNASE1L3 mutation	Plasma	H1	278476464	278156850	141113711	50.7317	72500258	51.38	68613453	6.84	99.8088
Homozygous DNASE1L3 mutation	Plasma	H2	263102391	262604508	75187228	28.6314	21574578	28.69	53612650	3.64	99.7782
Homozygous DNASE1L3 mutation	Plasma	H4	252299961	251698206	67363901	26.7638	22278534	33.07	45085367	3.26	99.6783
Homozygous DNASE1L3 mutation	Plasma	V11	369324299	368169815	23524823	6.38967	12322132	52.38	11202691	1.14	99.7508
