# Supplementary material for: Nuclease deficiencies alter plasma cell-free DNA methylation profiles
Source: HighWire-hosted journal article supplement (doi:10.1101/gr.275426.121), 2021-09-01
Supplement: Supplemental_Table_S3.xlsx [file Supplemental_Table_S3.xlsx]

## Sheet: 0&100 counts
Supplementary Table 3. Fragment counts obtained after filtering for 0% or 100% methylation
Mouse genotype	Sample type	Sample ID	0% methylated fragment counts	100% methylated fragment counts
Wildtype	Plasma	MuBS_WT_1	2920994	12830809
Wildtype	Plasma	MuBS_WT_2	2598137	10118699
Wildtype	Plasma	MuBS_WT_3	2530101	10254587
Wildtype	Plasma	MuBS_WT_4	2336406	9029780
Wildtype	Plasma	MuBS09	1255697	6629431
Wildtype	Plasma	MuBS13	1510646	7875527
Dnase1l3−/−	Plasma	MuBS_1L3_1	2341783	6720331
Dnase1l3−/−	Plasma	MuBS_1L3_2	2493581	4342448
Dnase1l3−/−	Plasma	MuBS_1L3_3	1879789	4294911
Dnase1l3−/−	Plasma	MuBS_1L3_4	1513149	3979756
Dnase1l3−/−	Plasma	MuBS03	1157624	4285231
Dnase1l3−/−	Plasma	MuBS14	1326350	4988473
Dnase1−/−	Plasma	MuBS_D1_1	2220920	11022479
Dnase1−/−	Plasma	MuBS_D1_2	2463994	11462232
Dnase1−/−	Plasma	MuBS_D1_3	2757792	13357978
Dnase1−/−	Plasma	MuBS_D1_4	2700018	11324881
Dnase1−/−	Plasma	MuBS05	1683126	10131243
Dnase1−/−	Plasma	MuBS06	1351260	7920150
